total intravenous anesthesia is associated with better survival than desflurane anesthesia in colon cancer surgery. *ANESTHESIOLOGY* 2018; 129:932–41

2. Wigmore TJ, Mohammed K, Jhanji S: Long-term survival for patients undergoing volatile *versus* IV anesthesia for cancer surgery: A retrospective analysis. *ANESTHESIOLOGY* 2016; 124:69–79
3. Enlund M, Berglund A, Andreasson K, Cicek C, Enlund A, Bergkvist L: The choice of anaesthetic—sevoflurane or propofol—and outcome from cancer surgery: A retrospective analysis. *Ups J Med Sci* 2014; 119:251–61
4. Jun IJ, Jo JY, Kim JI, Chin JH, Kim WJ, Kim HR, Lee EH, Choi IC: Impact of anesthetic agents on overall and recurrence-free survival in patients undergoing esophageal cancer surgery: A retrospective observational study. *Sci Rep* 2017; 7:14020
5. Zheng X, Wang Y, Dong L, Zhao S, Wang L, Chen H, Xu Y, Wang G: Effects of propofol-based total intravenous anesthesia on gastric cancer: A retrospective study. *Onco Targets Ther* 2018; 11:1141–8
6. Sessler DI, Riedel B: Anesthesia and cancer recurrence: Context for divergent study outcomes. *ANESTHESIOLOGY* 2019; 130:3–5
7. Austin PC: An Introduction to propensity score methods for reducing the effects of confounding in observational studies. *Multivariate Behav Res* 2011; 46:399–424
8. Wacholder S, Silverman DT, McLaughlin JK, Mandel JS: Selection of controls in case-control studies. III. Design options. *Am J Epidemiol* 1992; 135:1042–50

(Accepted for publication April 1, 2019.)

## Incorrect *P* Values in Two Articles by Ke-Xuan Liu, M.D., Ph.D., *et al.*

To the Editor:

We have read with interest the editorial by Drs. Kharasch and Houle<sup>1</sup> regarding an algorithm developed by Carlisle to detect nonrandom sampling in clinical trials.<sup>2</sup> Two of our previous articles<sup>3,4</sup> published in *ANESTHESIOLOGY* were mentioned in Carlisle's publication, and we were asked by the journal to verify the

correctness of reporting in these articles. Upon review, it is apparent that the *P* values in tables 1 and 2 of our 2014 article<sup>3</sup> and in table 2 of our 2013 article<sup>4</sup> are systematically incorrect, given the descriptive statistics. We are unable to locate the primary data to recalculate the *P* values in these tables. We have located the primary data for table 3 of the 2014 article and verified that the descriptive data presented in the article are correct. We believe that the reported descriptive statistics, including tables 1 and 2 in both articles, are correct, and that the reported *P* values are incorrect as the result of a systematic error. We believe this has been a systematic copy-and-paste error when data were transferred from one set of analysis to the tables. We have recalculated the *P* values using the descriptive statistics with simplified *t* tests, and we have found that all new *P* values are systematically smaller than the reported erroneous *P* values. Thus, we believe the conclusions of our studies are not affected by the error.

### Competing Interests

The authors declare no competing interests.

Ke-Xuan Liu, M.D., Ph.D., Cai Li, M.D., Ph.D., Wen-Han Yang, M.D., Ph.D. Southern Medical University Nanfang Hospital, Guangzhou, China (K.-X.L.). liukexuan705@163.com

DOI: 10.1097/ALN.0000000000002792

### References

1. Kharasch ED, Houle TT. Errors and integrity in seeking and reporting apparent research misconduct. *ANESTHESIOLOGY* 2017; 127:733–7
2. Carlisle JB: Data fabrication and other reasons for non-random sampling in 5087 randomised, controlled trials in anaesthetic and general medical journals. *Anaesthesia* 2017; 72:944–52
3. Li C, Xu M, Wu Y, Li YS, Huang WQ, Liu KX: Limb remote ischemic preconditioning attenuates lung injury after pulmonary resection under propofol-remifentanyl anesthesia: A randomized controlled study. *ANESTHESIOLOGY* 2014; 121:249–59
4. Li C, Li YS, Xu M, Wen SH, Yao X, Wu Y, Huang CY, Huang WQ, Liu KX: Limb remote ischemic preconditioning for intestinal and pulmonary protection during elective open infrarenal abdominal aortic aneurysm repair: A randomized controlled trial. *ANESTHESIOLOGY* 2013; 118:842–52

(Accepted for publication April 1, 2019.)
